# Supplementary material for: Accelerated estimation of sea-spray-mediated heat flux using Gaussian quadrature: case studies with a coupled CFSv2.0-WW3 system
Source: Copernicus journal article supplement (doi:10.5194/gmd-16-1839-2023), 2023-03-31
Supplement: Supplementary file 1 [file gmd-16-1839-2023-supplement.pdf]

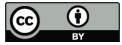

*Supplement of*

## **Accelerated estimation of sea-spray-mediated heat flux using Gaussian quadrature: case studies with a coupled CFSv2.0-WW3 system**

**Ruizi Shi and Fanghua Xu**

*Correspondence to:* Fanghua Xu ([fxu@mail.tsinghua.edu.cn](mailto:fxu@mail.tsinghua.edu.cn))

The copyright of individual parts of the supplement might differ from the article licence.

## Contents of this file

Figures S1 to S21

### Introduction

Figure S1 is the scatter plot of  $r_{L3}$  vs 10-m wind speed.

Figure S2&S3 are the WSP10 of SPRAY-GQ in Jan-Feb, 2017 and Aug-Sep, 2018.

Figure S4 is the global 53-day averaged SST differences between SPRAY-A15 and OISST, and the differences between SPRAY-GQ and SPRAY-A15 in Jan-Feb, 2017.

Figure S5 is the mean error of SPRAY-A15 and SPRAY-GQ in Jan-Feb, 2017 and Aug-Sep, 2018.

Figure S6 is the global 53-day averaged SST differences between SPRAY-A15 and OISST, and the differences between SPRAY-GQ and SPRAY-A15 in Aug-Sep, 2018.

Figure S7&S8 are the global 53-day averaged WSP10 differences between SPRAY-A15 and ERA5, and the differences between SPRAY-GQ and SPRAY-A15 in Jan-Feb, 2017 and Aug-Sep, 2018.

Figure S9-S12 are the average WSP10/SWH differences between SPRAY-A15/SPRAY-GQ and satellite data, differences between SPRAY-A15/SPRAY-GQ and ERA5, and differences between ERA5 and satellite data in Jan-Feb, 2017 and Aug-Sep, 2018.

Figure S13&S14 are the global 53-day averaged SWH differences between SPRAY-A15 and ERA5, and the differences between SPRAY-GQ and SPRAY-A15 in Jan-Feb, 2017 and Aug-Sep, 2018.

Figure S15&S16 are the 53-day average wind and SLP of SPRAY-A15 and SPRAY-GQ, and their differences in Jan-Feb, 2017 and Aug-Sep, 2018.

Figure S17-S21 are the 53-day average SST/WSP10/SWH/T02/SPH differences between CTRL and OISST/ERA5, differences between SPRAY-GQ and CTRL, and MAE differences between SPRAY-GQ and CTRL in Jan-Feb, 2017 and Aug-Sep, 2018.

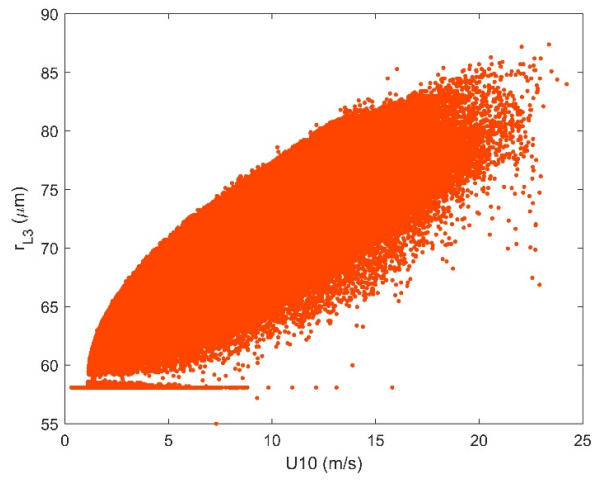

**Figure S1.** The scatter plot of  $r_{L3}$  (y-axis) vs 10-m wind speed (x-axis)

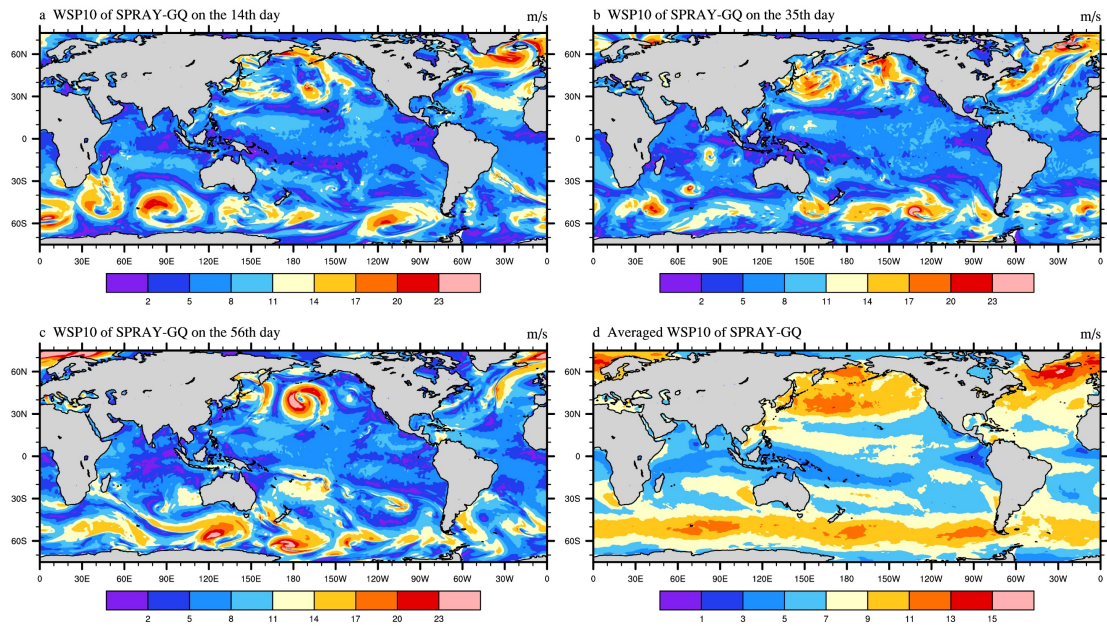

**Figure S2.** The WSP10 (m/s) of SPRAY-GQ in Jan-Feb, 2017: (a) the 14<sup>th</sup> day; (b) the 35<sup>th</sup> day; (c) the 56<sup>th</sup> day; (d) the 53-day average, with the first 3-day simulation discarded.

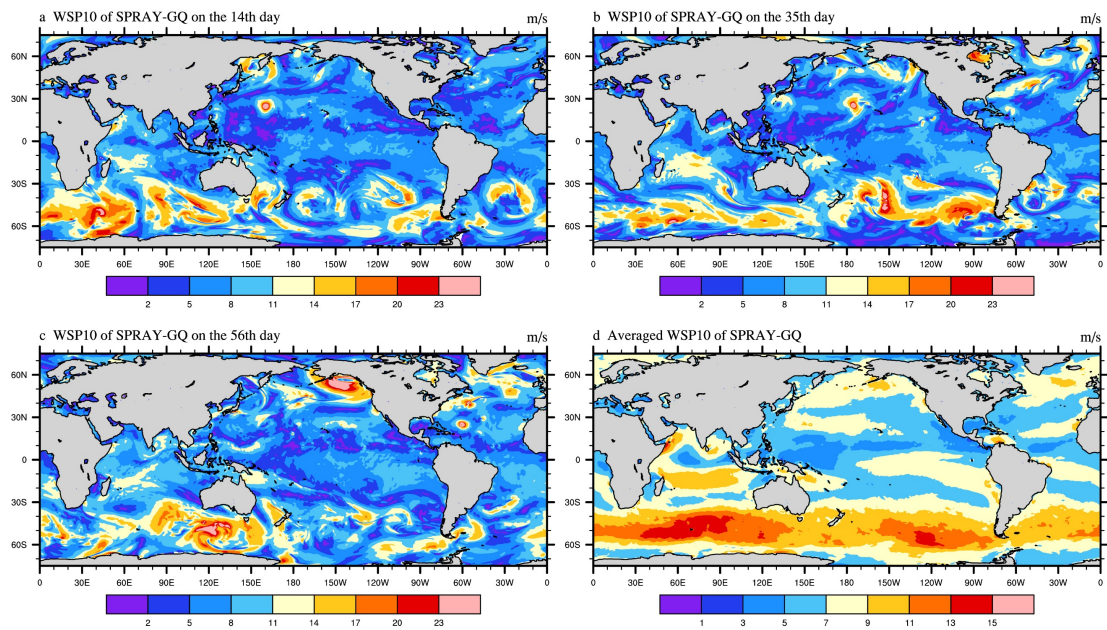

**Figure S3.** The same as Figure S2, but for Aug-Sep, 2018.



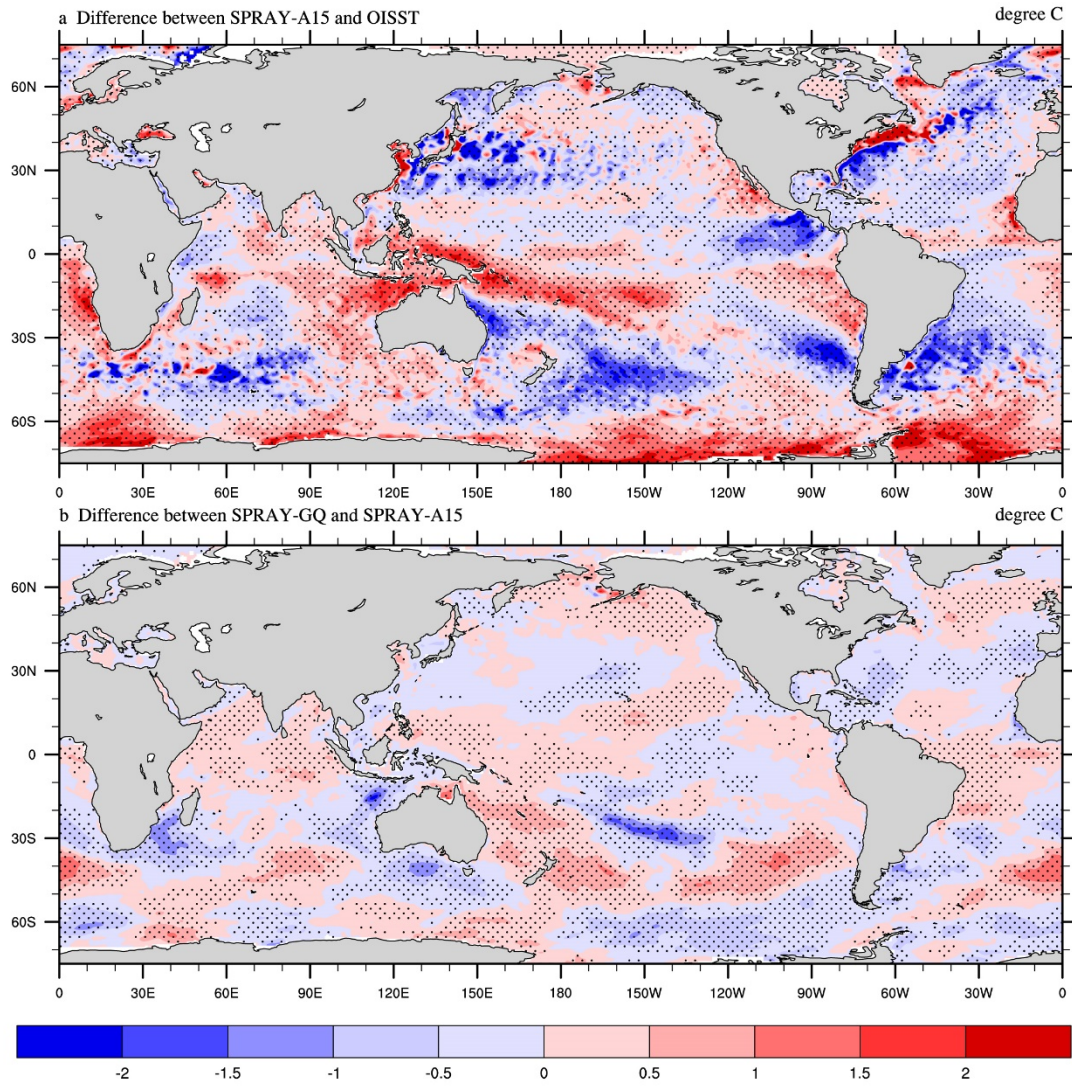

**Figure S4.** The global 53-day averaged SST ( $^{\circ}\text{C}$ ) differences between SPRAY-A15 and OISST (a; SPRAY-A15 minus OISST) and the differences between SPRAY-GQ and SPRAY-A15 (b; SPRAY-GQ minus SPRAY-A15) in Jan-Feb, 2017. The first 3-day simulation is discarded. The dotted areas are statistically significant at 95% confidence level.

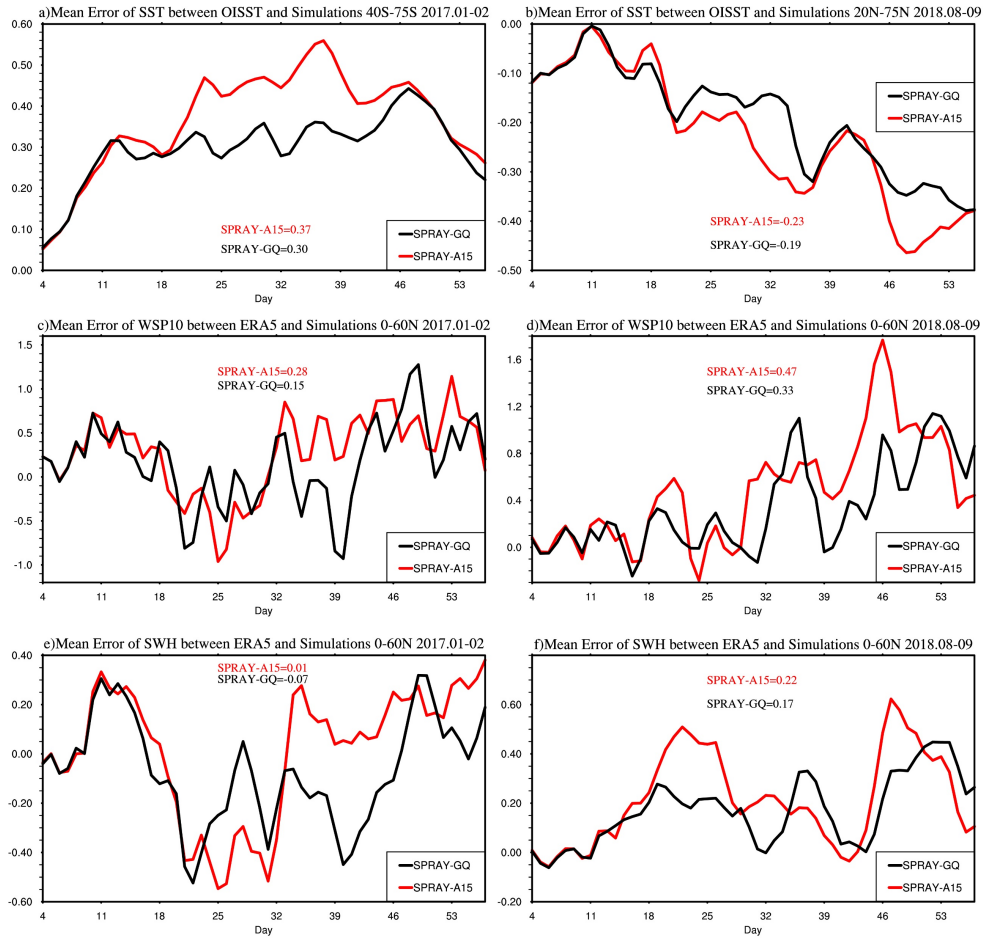

**Figure S5.** The mean error of SPRAY-A15 (red) and SPRAY-GQ (black) in Jan-Feb, 2017 (a, c, e) and Aug-Sep, 2018 (b, d, f): (a) SST of 0-360°E, 40-75°S; (b) SST of 0-360°E, 20-75°N; (c&d) WSP10 of 0-360°E, 0-60°N; (e&f) SWH of 0-360°E, 0-60°N.

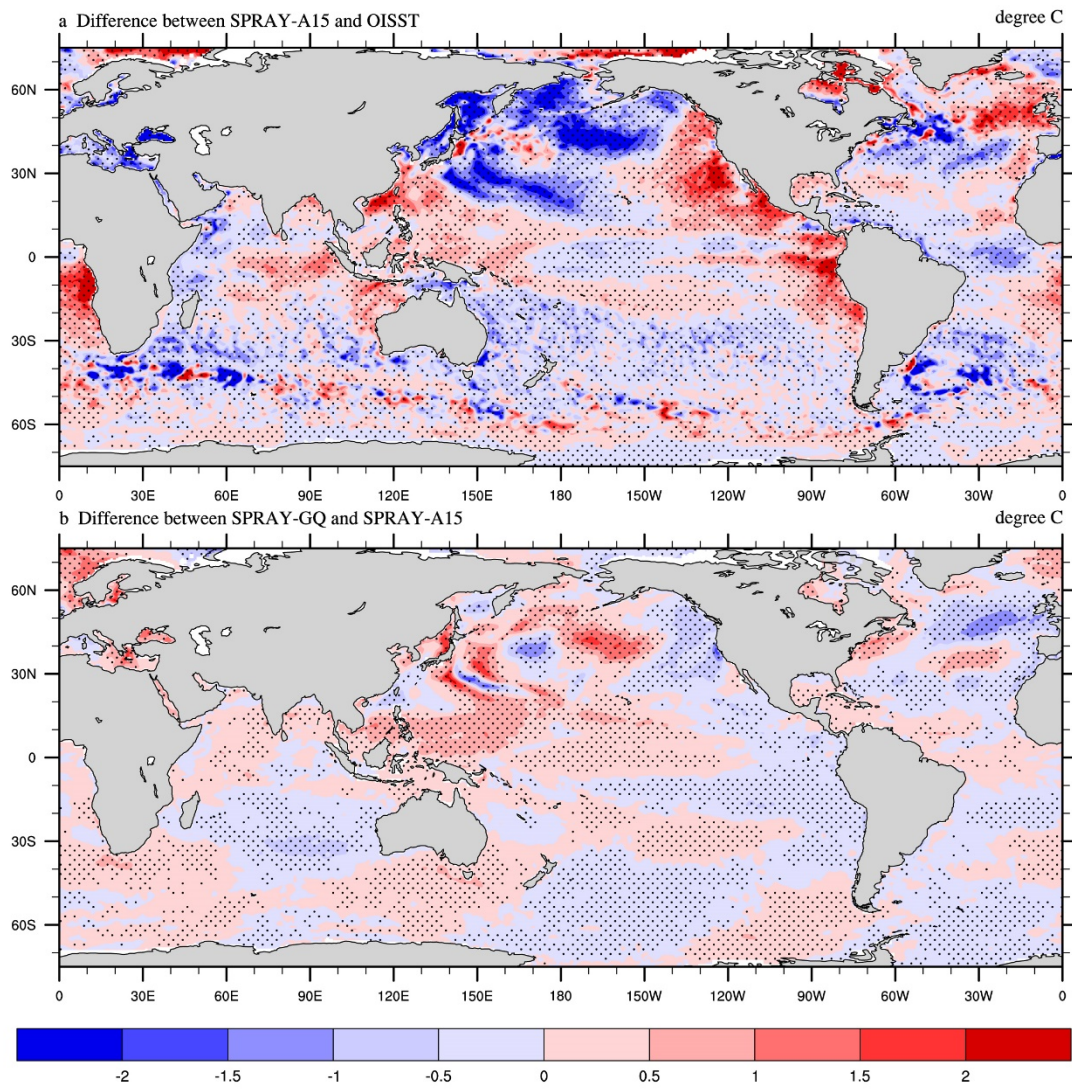

Figure S6. The same as Figure S4, but for Aug-Sep, 2018.



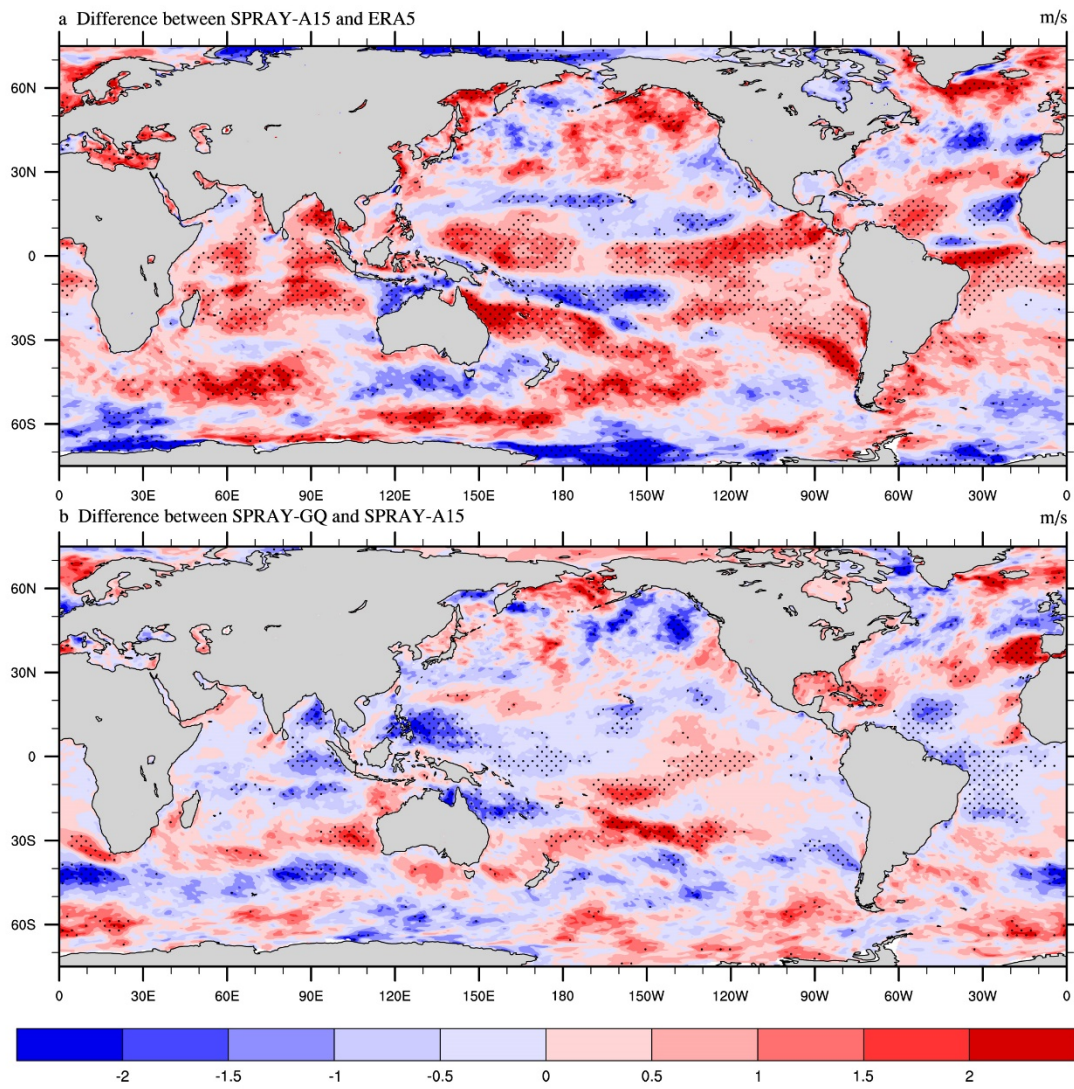

**Figure S7.** The global 53-day averaged WSP10 (m/s) differences between SPRAY-A15 and ERA5 (a; SPRAY-A15 minus ERA5), and the differences between SPRAY-GQ and SPRAY-A15 (b; SPRAY-GQ minus SPRAY-A15) in Jan-Feb, 2017. The first 3-day simulation is discarded. The dotted areas are statistically significant at 95% confidence level.

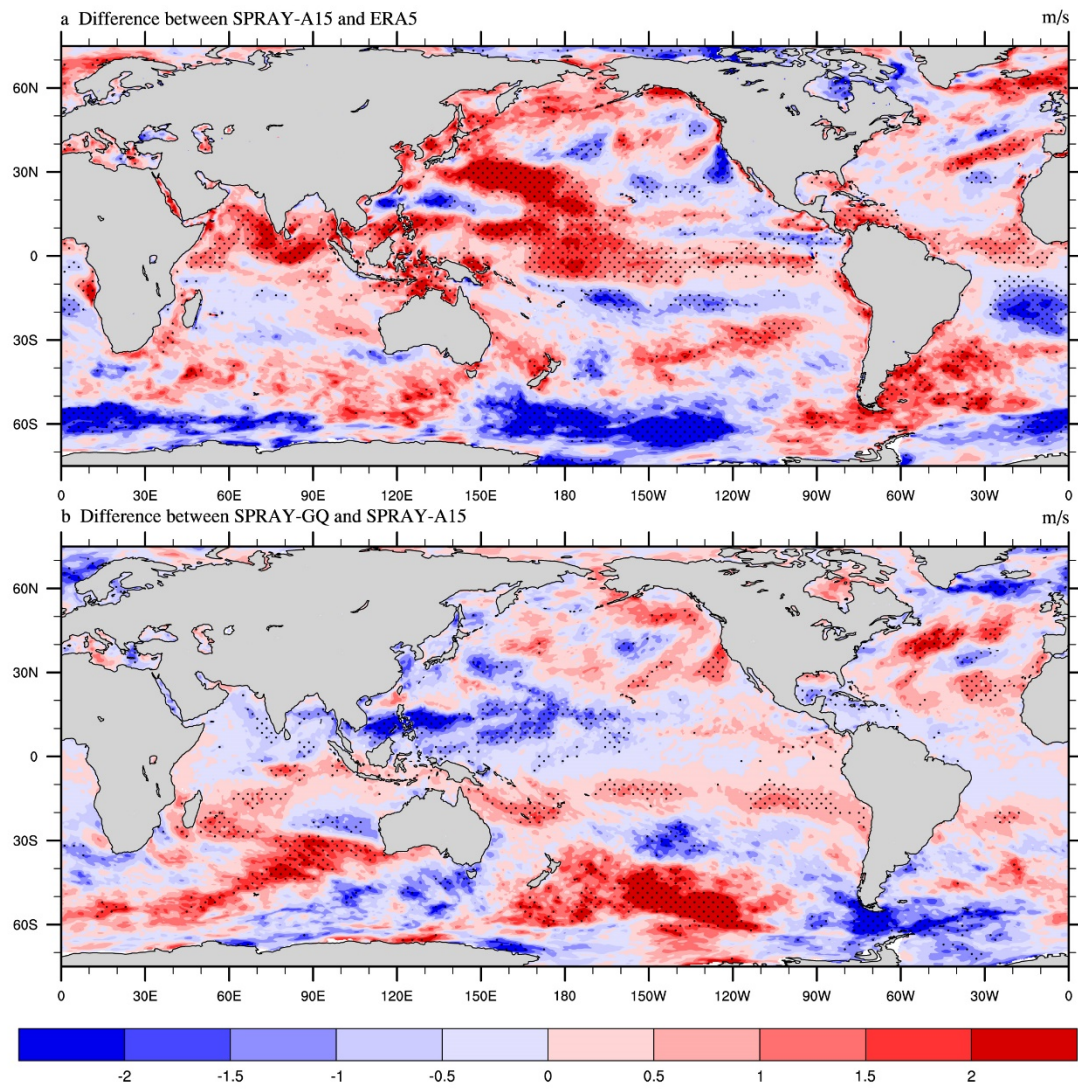

**Figure S8.** The same as Figure S7, but for Aug-Sep, 2018.

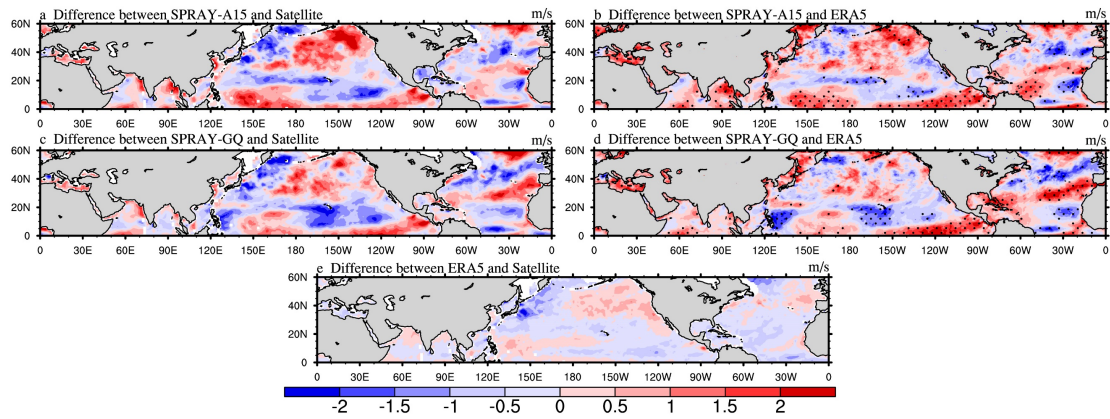

**Figure S9.** The average WSP10 (m/s) differences between SPRAY-A15/SPRAY-GQ and satellite data (a/c; SPRAY-A15/SPRAY-GQ minus satellite data), differences between SPRAY-A15/SPRAY-GQ and ERA5 (b/d; SPRAY-A15/SPRAY-GQ minus ERA5), and differences between ERA5 and satellite data (e; ERA5 minus satellite data) in Jan-Feb, 2017. The dotted areas are statistically significant at 95% confidence level.

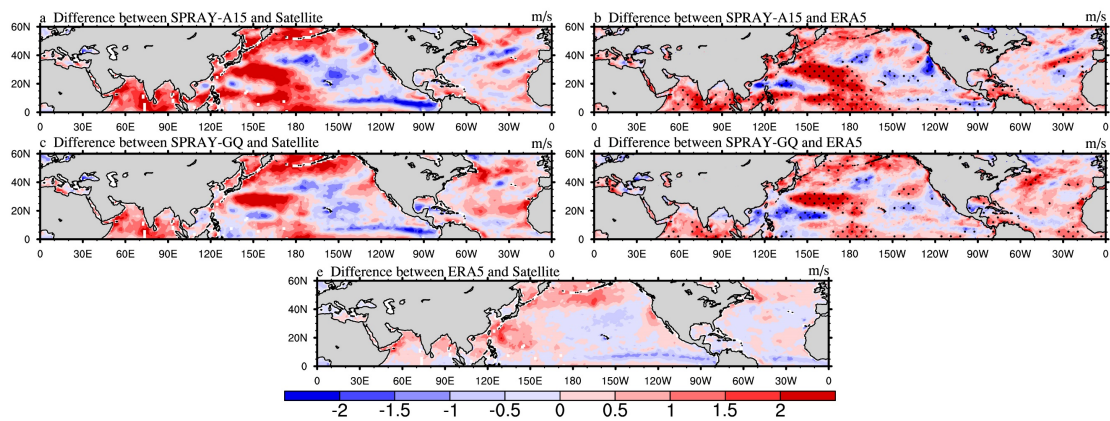

**Figure S10.** The same as Figure S9, but for Aug-Sep, 2018.



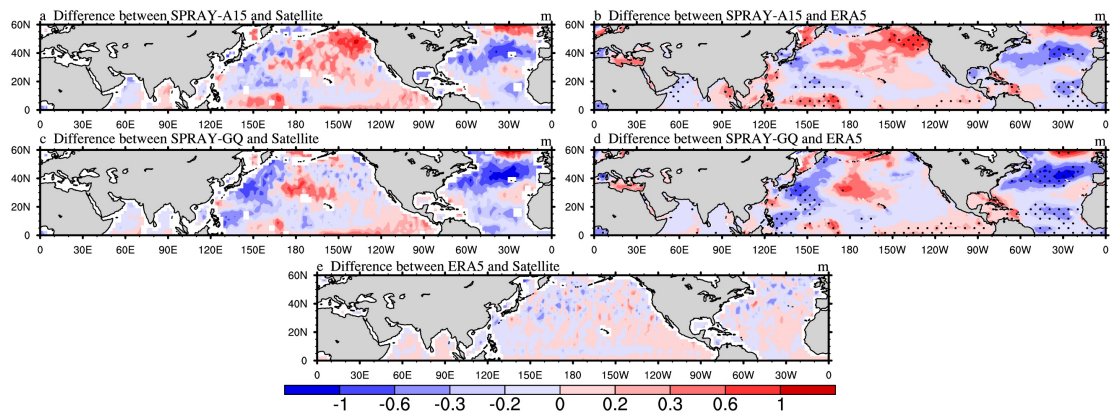

**Figure S11.** The average SWH (m) differences between SPRAY-A15/SPRAY-GQ and satellite data (a/c; SPRAY-A15/SPRAY-GQ minus satellite data), differences between SPRAY-A15/SPRAY-GQ and ERA5 (b/d; SPRAY-A15/SPRAY-GQ minus ERA5), and differences between ERA5 and satellite data (e; ERA5 minus satellite data) in Jan-Feb, 2017. The dotted areas are statistically significant at 95% confidence level.

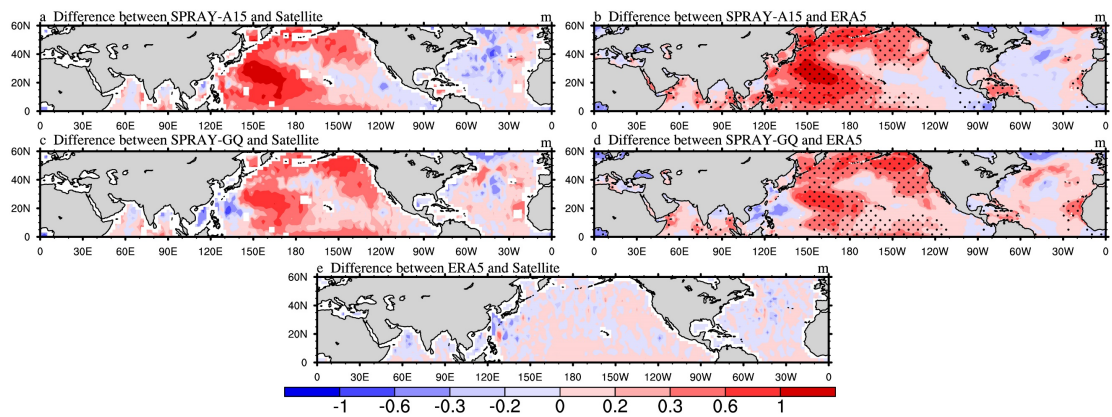

**Figure S12.** The same as Figure S11, but for Aug-Sep, 2018.



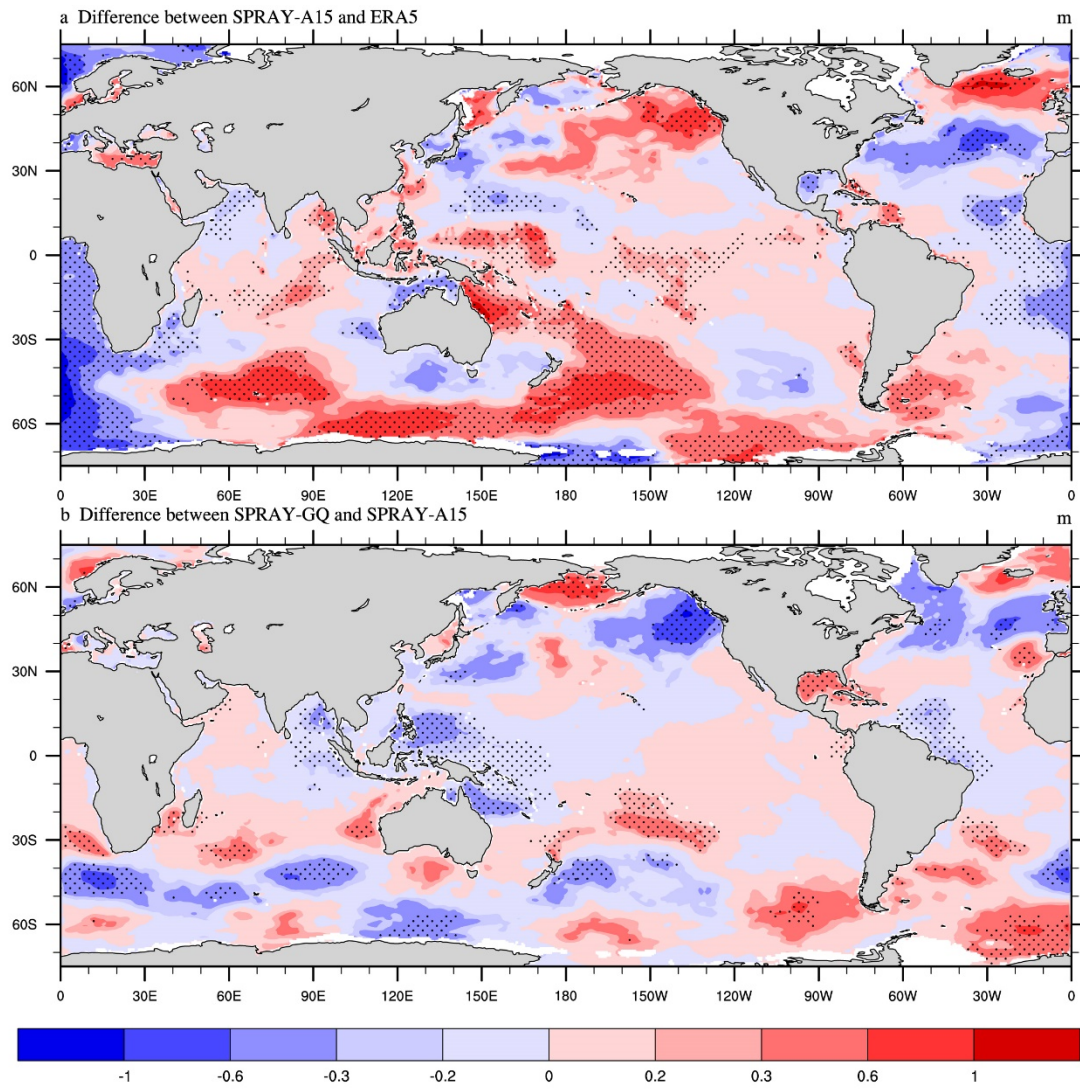

**Figure S13.** The global 53-day averaged SWH (m) differences between SPRAY-A15 and ERA5 (a; SPRAY-A15 minus ERA5), and the differences between SPRAY-GQ and SPRAY-A15 (b; SPRAY-GQ minus SPRAY-A15) in Jan-Feb, 2017. The first 3-day simulation is discarded. The dotted areas are statistically significant at 95% confidence level.

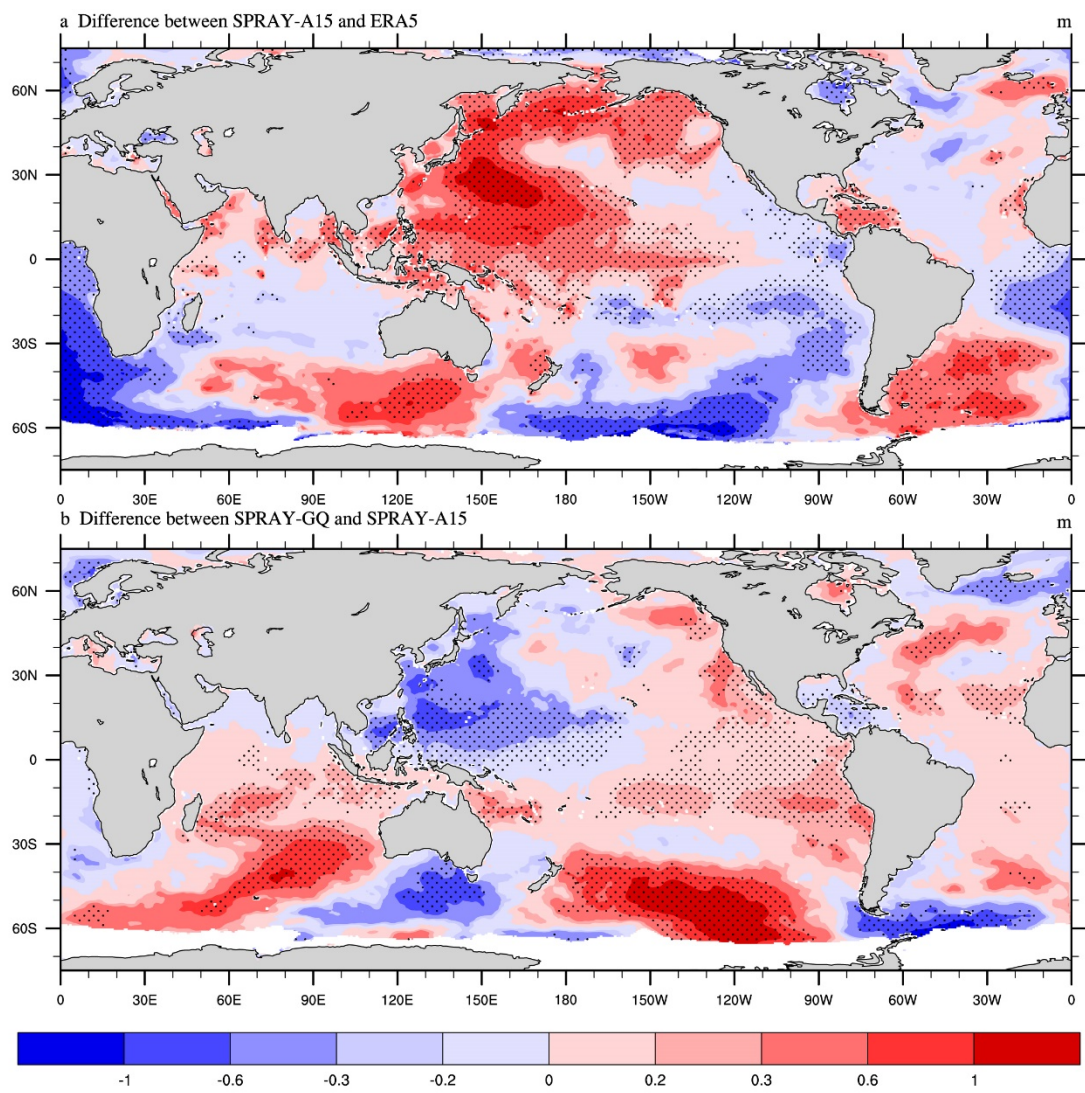

**Figure S14.** The same as Figure S13, but for Aug-Sep, 2018.

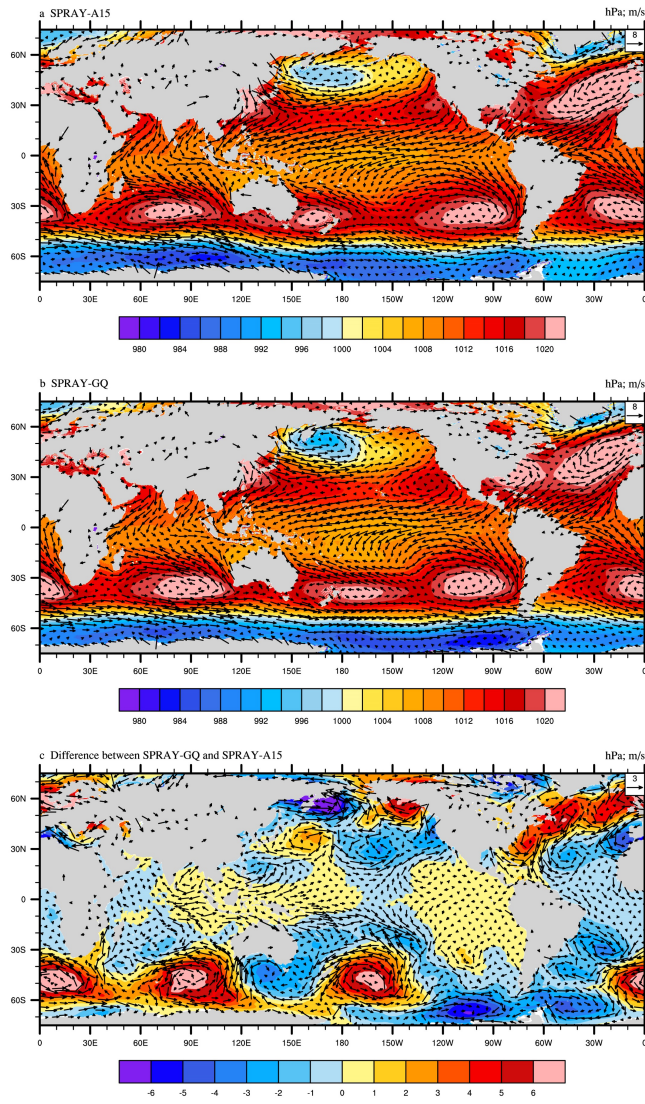

**Figure S15.** The 53-day average wind (m/s) and SLP (hPa) of SPRAY-A15 (a) and SPRAY-GQ (b), and their differences (c; SPRAY-GQ minus SPRAY-A15) in Jan-Feb, 2017.



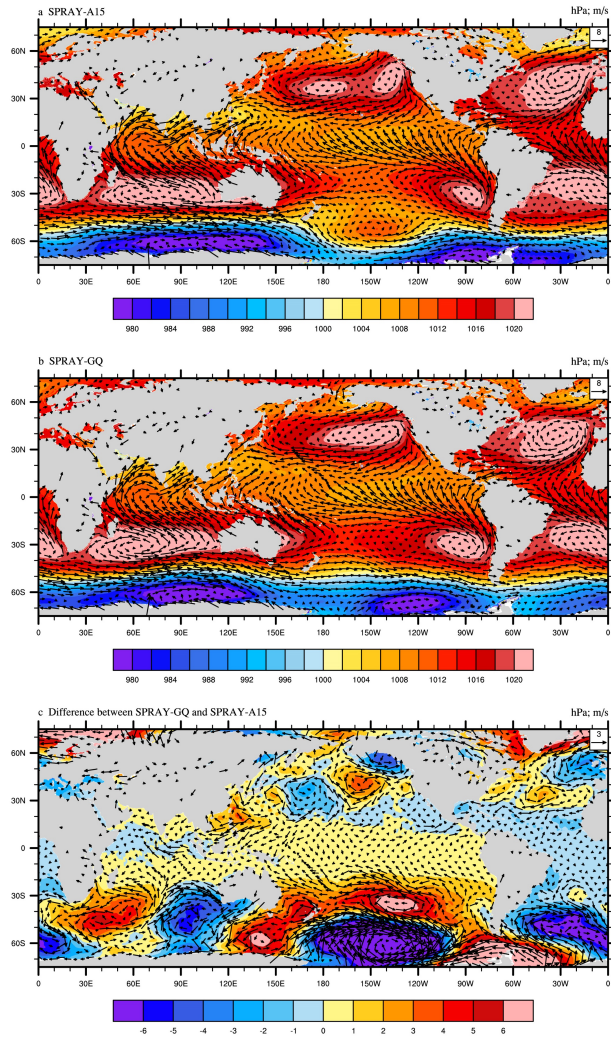

Figure S16. The same as Figure S15, but for Aug-Sep, 2018.

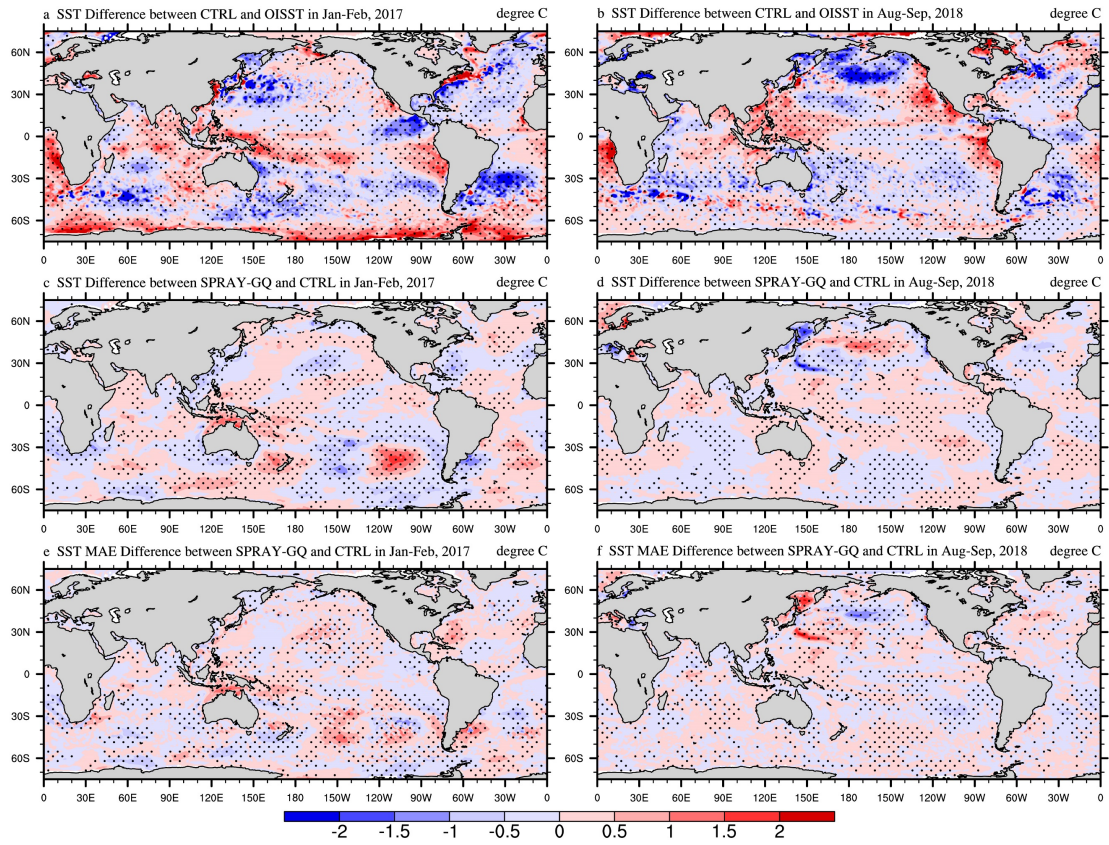

**Figure S17.** The 53-day average SST differences between CTRL and OISST (a&b; CTRL minus OISST), differences between SPRAY-GQ and CTRL (c&d; SPRAY-GQ minus CTRL), and MAE differences between SPRAY-GQ and CTRL (e&f) in Jan-Feb, 2017 (a, c, e) and in Aug-Sep, 2018 (b, d, f). The first 3-day simulation is discarded. The dotted areas are statistically significant at 95% confidence level.

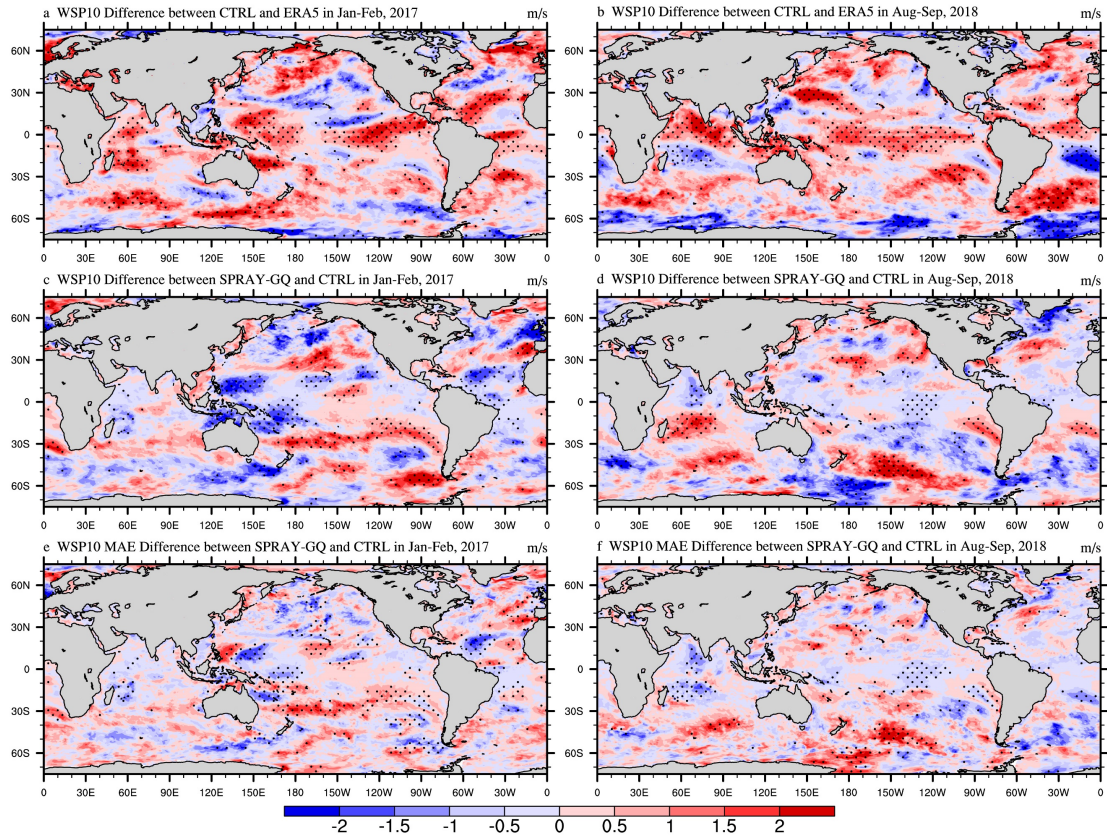

**Figure S18.** The 53-day average WSP10 differences between CTRL and ERA5 (a&b; CTRL minus ERA5), differences between SPRAY-GQ and CTRL (c&d; SPRAY-GQ minus CTRL), and MAE differences between SPRAY-GQ and CTRL (e&f) in Jan-Feb, 2017 (a, c, e) and in Aug-Sep, 2018 (b, d, f). The first 3-day simulation is discarded. The dotted areas are statistically significant at 95% confidence level.



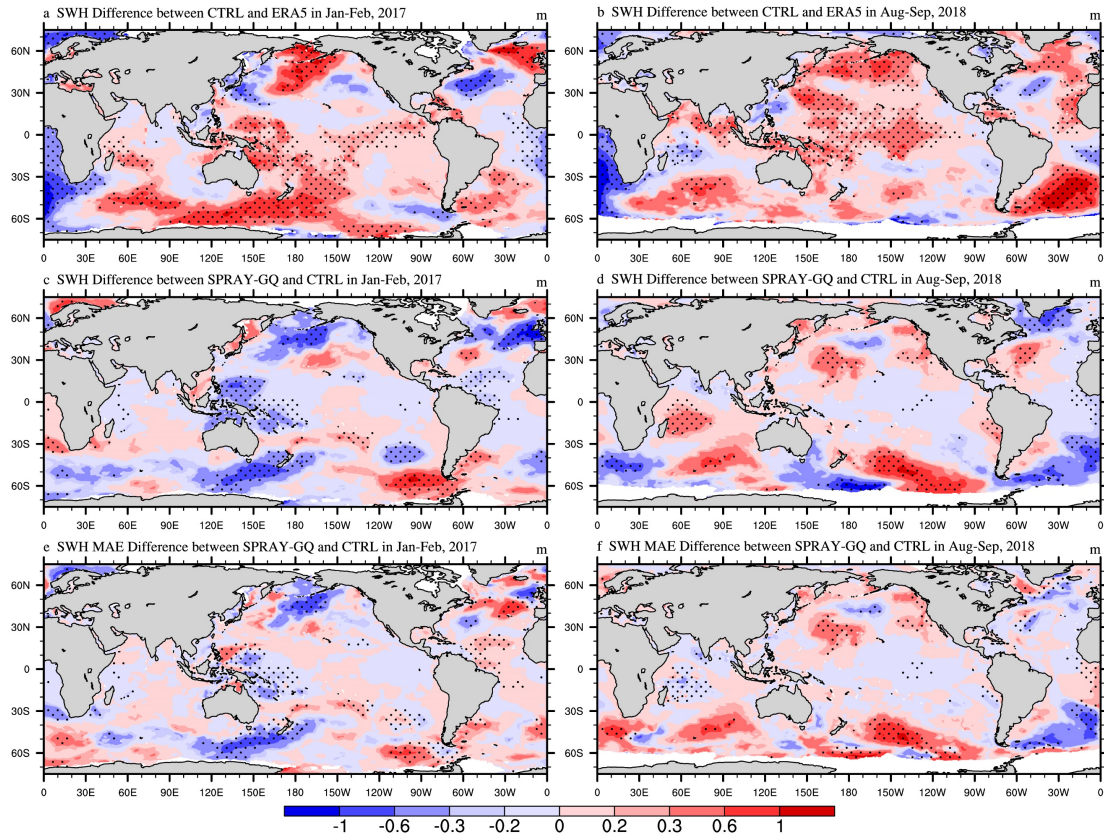

**Figure S19.** The 53-day average SWH differences between CTRL and ERA5 (a&b; CTRL minus ERA5), differences between SPRAY-GQ and CTRL (c&d; SPRAY-GQ minus CTRL), and MAE differences between SPRAY-GQ and CTRL (e&f) in Jan-Feb, 2017 (a, c, e) and in Aug-Sep, 2018 (b, d, f). The first 3-day simulation is discarded. The dotted areas are statistically significant at 95% confidence level.



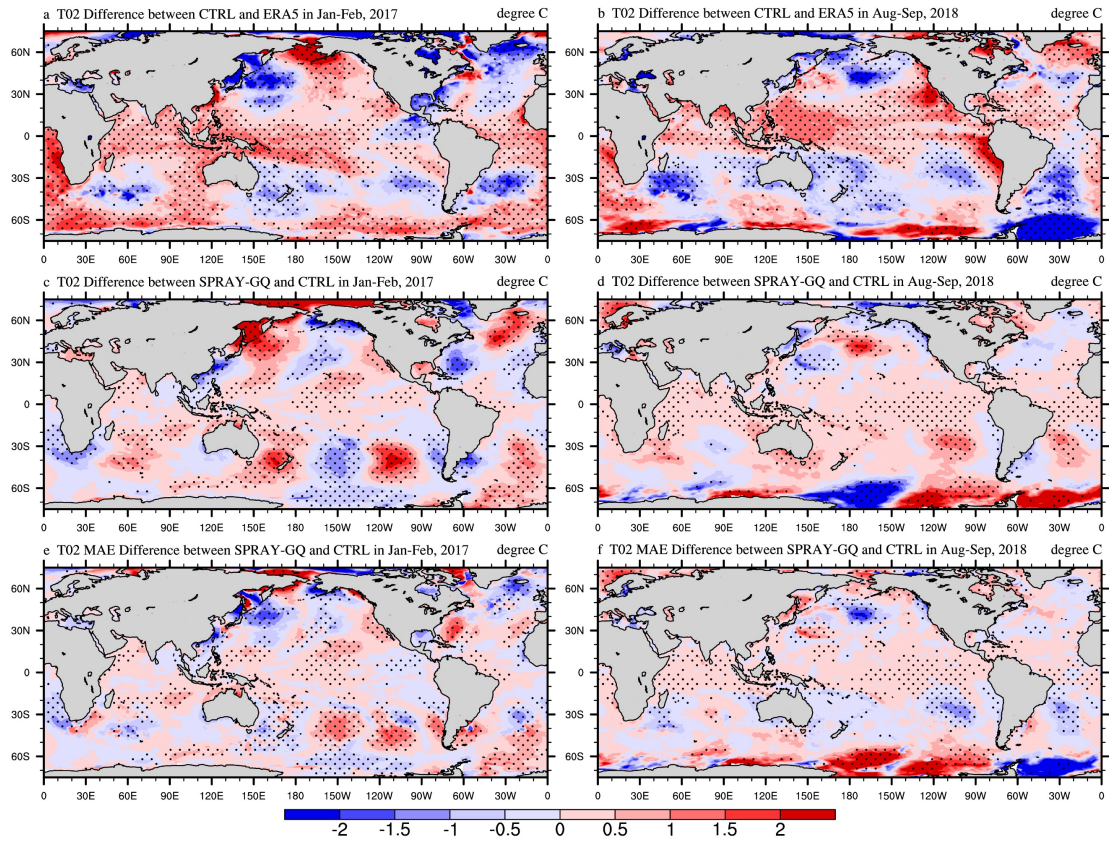

**Figure S20.** The 53-day average T02 differences between CTRL and ERA5 (a&b; CTRL minus ERA5), differences between SPRAY-GQ and CTRL (c&d; SPRAY-GQ minus CTRL), and MAE differences between SPRAY-GQ and CTRL (e&f) in Jan-Feb, 2017 (a, c, e) and in Aug-Sep, 2018 (b, d, f). The first 3-day simulation is discarded. The dotted areas are statistically significant at 95% confidence level.

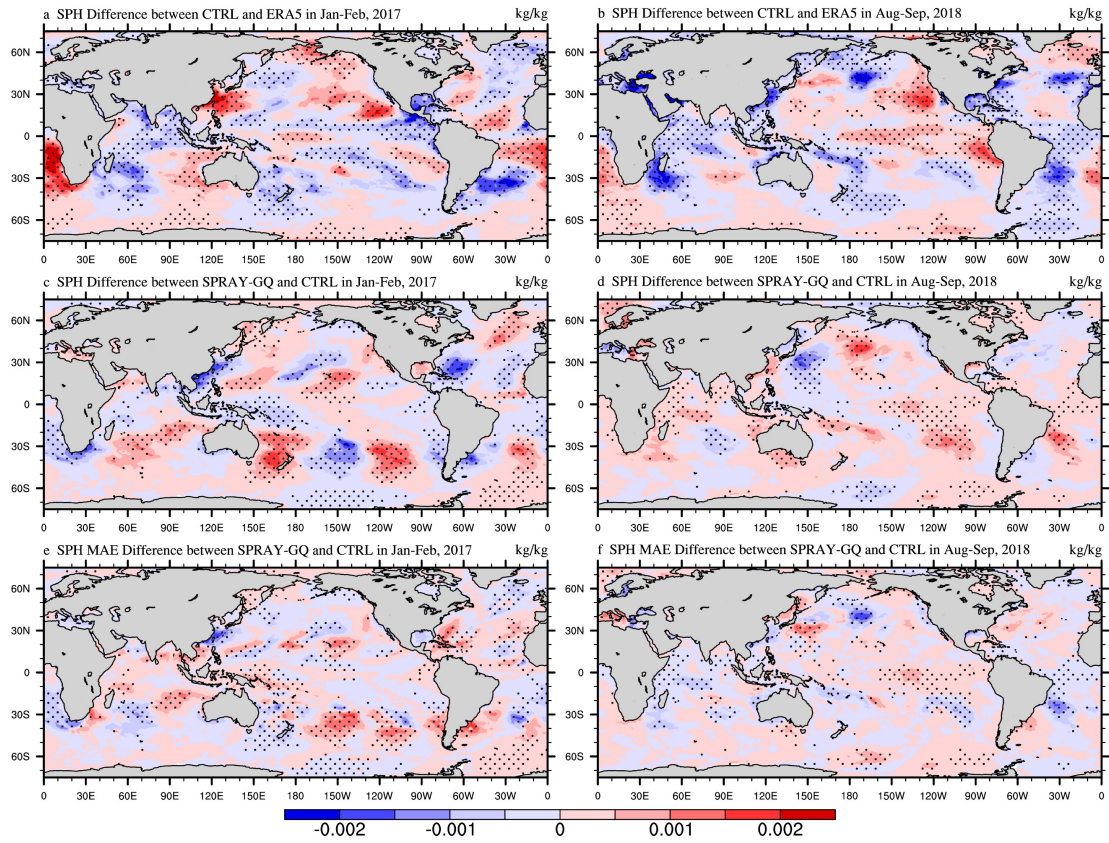

**Figure S21.** The 53-day average SPH differences between CTRL and ERA5 (a&b; CTRL minus ERA5), differences between SPRAY-GQ and CTRL (c&d; SPRAY-GQ minus CTRL), and MAE differences between SPRAY-GQ and CTRL (e&f) in Jan-Feb, 2017 (a, c, e) and in Aug-Sep, 2018 (b, d, f). The first 3-day simulation is discarded. The dotted areas are statistically significant at 95% confidence level.
